# Supplementary material for: Improved Assembly of Metagenome-Assembled Genomes and Viruses in Tibetan Saline Lake Sediment by HiFi Metagenomic Sequencing
Source: PubMed Central journal article supplement (PMC9927493; doi:10.1128/spectrum.03328-22), 2022-12-08

1  
2  
3  
4  
5  
6  
7  
8  
9  
10  
11  
12  
13  
14  
15  
16  
17  
18  
19  
20

**Supporting information**

**Improved assembly of MAGs and viruses in Tibetan saline lake sediment by HiFi metagenomic sequencing**

Ye Tao<sup>1,2</sup>, Fan Xun<sup>1,2</sup>, Cheng Zhao<sup>1,2</sup>, Zhendu Mao<sup>1,2</sup>, Biao Li<sup>1</sup>, Peng Xing<sup>1\*</sup>, and Qinglong L. Wu<sup>1,2,3</sup>

<sup>1</sup>State Key Laboratory of Lake Science and Environment, Nanjing Institute of Geography and Limnology, Chinese Academy of Sciences, Nanjing 210008, China

<sup>2</sup>University of Chinese Academy of Sciences, Beijing 100049, China

<sup>3</sup>[Center for Evolution and Conservation Biology, Southern Marine Sciences and Engineering Guangdong Laboratory \(Guangzhou\), Guangzhou 511458, China](#)

\*Author for correspondence, Prof. Dr. Peng Xing, Email: pxing@niglas.ac.cn; Phone: 86 25 86882112; Fax: 86 25 5771 4759

Running head: HiFi-read sequencing for extremophiles

21

22 **Supplementary Tables**

23 **Table S1** Physiochemical information of the sediment samples from five sites within

24 Lake Cuochuolong.

| <b>Site</b>           | <b>CCL1</b> | <b>CCL2</b> | <b>CCL3</b> | <b>CCL4</b> | <b>CCL5</b> |
|-----------------------|-------------|-------------|-------------|-------------|-------------|
| Longitude(°E)         | 85.4063     | 85.40487    | 85.40274    | 85.40061    | 85.39687    |
| Latitude(°N)          | 29.12109    | 29.12113    | 29.122      | 29.12309    | 29.12333    |
| Altitude(m)           | 4610        | 4616        | 4616        | 4619        | 4623        |
| Temp(°C)              | 14.4        | 14.8        | 14.6        | 14.9        | 15.3        |
| pH                    | 9.3         | 9.24        | 9.27        | 9.26        | 9.25        |
| Conductivity(μS/cm)   | 34297       | 34782       | 34574       | 34773       | 35293       |
| Salinity (‰)          | 27.35       | 27.78       | 27.59       | 27.77       | 28.23       |
| sediment TOC (%)      | 2.69        | 0.67        | 0.85        | 1.22        | 1.10        |
| sediment TN (%)       | 0.21        | 0.04        | 0.05        | 0.09        | 0.05        |
| LOI (g/g dw sediment) | 0.22        | 0.23        | 0.24        | 0.22        | 0.19        |

25

26

27

28 **Table S2** The number of 16S/18S genes obtained by eight assemblers.

| Assembler         | HiFi   |          |              | Hybrid  |                  |         | NGS     |            |
|-------------------|--------|----------|--------------|---------|------------------|---------|---------|------------|
|                   | HiCanu | metaFlye | HiFiasm_meta | MaSuRCA | HybridmetaSPAdes | Operams | Megahit | metaSPAdes |
| 16S rRNA          | 69     | 154      | 384          | 318     | 233              | 354     | 263     | 222        |
| Partial 16S rRNA  | 17     | 42       | 113          | 70      | 193              | 277     | 223     | 200        |
| Complete 16S rRNA | 52     | 112      | 271          | 248     | 40               | 77      | 40      | 22         |
| Complete 16S-OTUs | 23     | 76       | 108          | 130     | 35               | 73      | 40      | 33         |
| 18S rRNA          | 81     | 150      | 385          | 318     | 115              | 176     | 126     | 93         |
| Partial 18S rRNA  | 80     | 141      | 367          | 315     | 111              | 167     | 126     | 93         |
| Complete 18S rRNA | 1      | 9        | 18           | 3       | 4                | 9       | 0       | 0          |
| Complete 18S-OTUs | 1      | 7        | 7            | 2       | 4                | 8       | 0       | 0          |

29

30

31

32

33 **Table S3** Summary of total MAGs identified in this study. The MAG quality classification: 'High' ( $\geq 90\%$  completeness,  $\leq 5\%$  contamination),  
34 'Medium' ( $\geq 50\%$  completeness,  $\leq 10\%$  contamination), and others were 'Low'. 'QS' means the quality score for MAG (completeness  $- 5 \times$   
35 contamination). 'High/Medium' MAGs were annotated by GTDB-Tk.

36 The information was saved in the file Table\_S3.xlsx.

37

删除了: mean

39

40

41 **Table S4** Statistical summary of the two cMAGs and their closest genomes.

|                         | ccl-hifiasmmeta.153 | GCA_020164535.1 | ccl-flye.84 | GCF_003387225.1 | GCF_004135935.1 |
|-------------------------|---------------------|-----------------|-------------|-----------------|-----------------|
| Genome Length (bp)      | 3,024,023           | 3,036,757       | 3,028,805   | 3,292,724       | 3,298,588       |
| N50 (bp)                | 2,560,458           | 458,041         | 3,028,805   | 931,588         | 3,298,588       |
| Contig Number           | 2                   | 15              | 1           | 8               | 1               |
| GC%                     | 36.6                | 36.6            | 62.5        | 62.2            | 62.3            |
| Gene Number             | 2,808               | 2,849           | 3,174       | 3,525           | 3,391           |
| Gene Density (genes/kb) | 0.928               | 0.938           | 1.047       | 1.07            | 1.028           |
| tRNA                    | 38                  | 37              | 46          | 44              | 45              |
| 16S rRNA copy           | 3                   | 1               | 1           | 1               | 1               |

42

43

44

45 **Table S5** Summary of viral genomes and the corresponding vOTUs.

46 The information was saved in [the](#) file Table\_S5.xlsx.

47

48

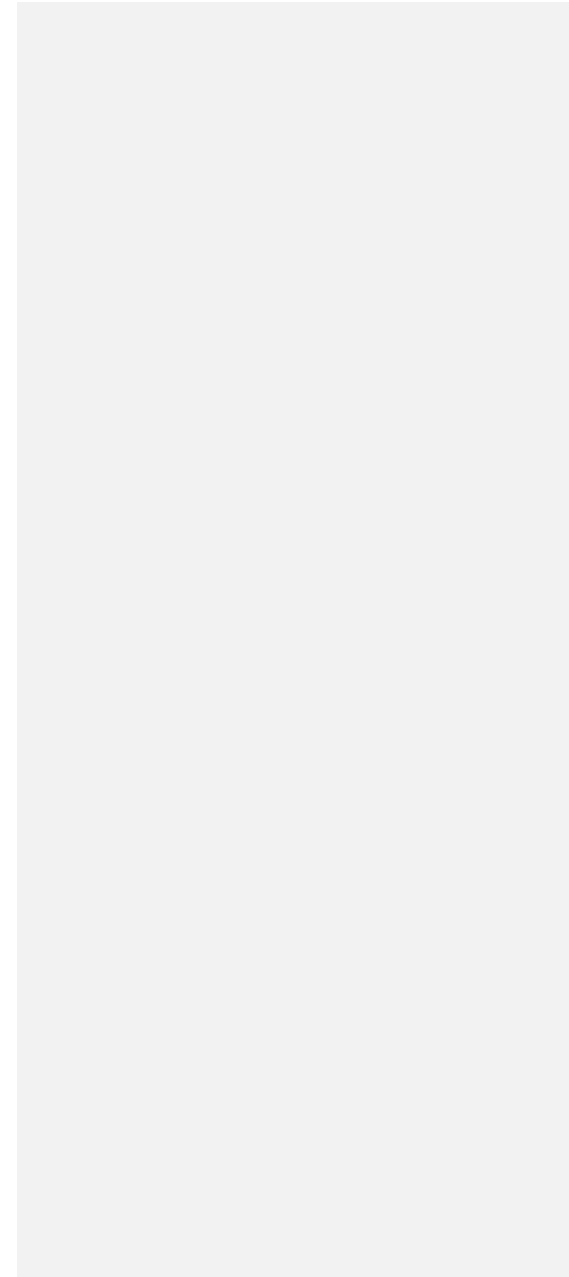

**Table S6** The genome length and family information of complete viral genomes.

| Methods      | ID               | Length (bp) | Family       |
|--------------|------------------|-------------|--------------|
| metaFlye     | contig_2047      | 49167       | Siphoviridae |
| metaFlye     | contig_3808      | 115239      | Myoviridae   |
| metaFlye     | contig_4001      | 33878       | Siphoviridae |
| metaFlye     | contig_4396      | 139208      | Myoviridae   |
| metaFlye     | contig_4507      | 99275       | Podoviridae  |
| metaFlye     | contig_4599      | 42086       | Podoviridae  |
| metaFlye     | contig_4601      | 34327       | Podoviridae  |
| metaFlye     | contig_4617      | 81194       | Podoviridae  |
| metaFlye     | contig_4636      | 38795       | Siphoviridae |
| metaFlye     | contig_4674      | 66614       | Siphoviridae |
| metaFlye     | contig_4777      | 24417       | Siphoviridae |
| metaFlye     | contig_4825      | 105314      | Podoviridae  |
| metaFlye     | contig_4868      | 38481       | Podoviridae  |
| metaFlye     | contig_4923      | 139613      | Myoviridae   |
| metaFlye     | contig_4947      | 331546      | Myoviridae   |
| metaFlye     | contig_4969      | 38946       | Siphoviridae |
| metaFlye     | contig_5055      | 29706       | Siphoviridae |
| metaFlye     | contig_533       | 40074       | Myoviridae   |
| metaFlye     | contig_820       | 80705       | Siphoviridae |
| HiFiasm_meta | s1426.ctg001639c | 40221       | Podoviridae  |
| HiFiasm_meta | s1601.ctg001836c | 47105       | Siphoviridae |
| HiFiasm_meta | s2495.ctg002855c | 43729       | Siphoviridae |
| HiFiasm_meta | s2912.ctg003323c | 39241       | Siphoviridae |
| HiFiasm_meta | s3034.ctg003459c | 65692       | Podoviridae  |
| HiFiasm_meta | s3209.ctg003658c | 34119       | Siphoviridae |
| HiFiasm_meta | s4718.ctg005371c | 28460       | Podoviridae  |
| HiFiasm_meta | s5458.ctg006209c | 37672       | Podoviridae  |
| HiFiasm_meta | s557.ctg000633c  | 131003      | Siphoviridae |
| HiFiasm_meta | s7064.ctg008018c | 39664       | Podoviridae  |

## Supplementary Figures

**Figure S1** Location of Lake Cuochuolong on the Tibetan Plateau and the sampling sites within the lake.

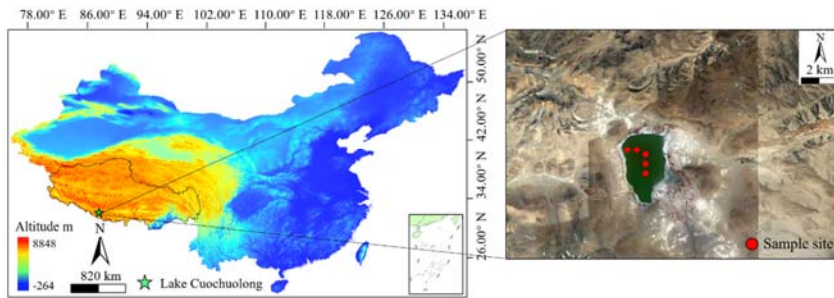



**Figure S2** Krona chart of detected species at different taxonomic levels using HiFi (A) and NGS (B) reads by Kraken2, respectively.

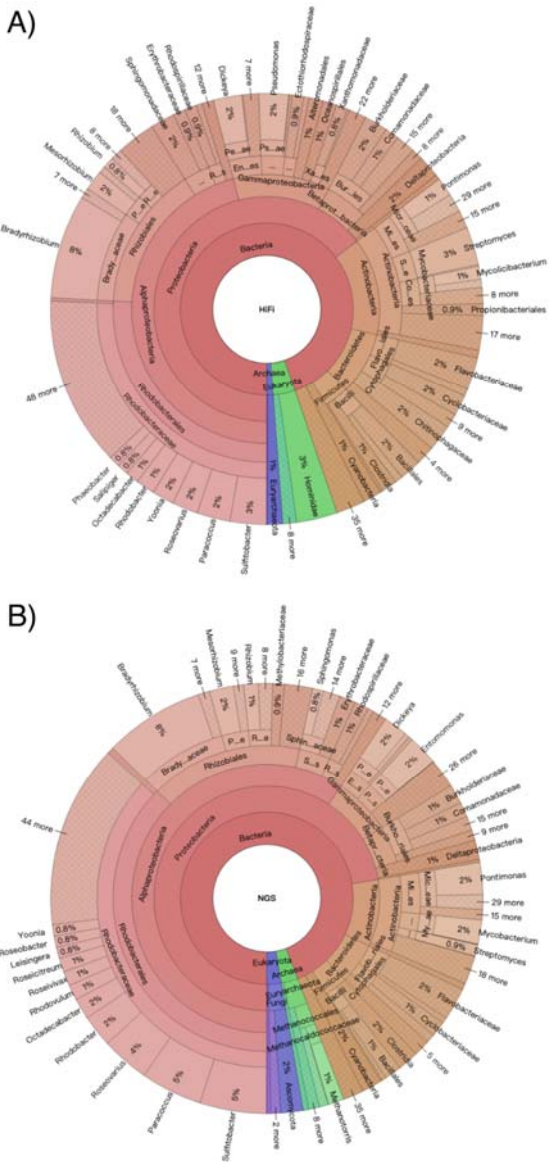

**Figure S3** Taxonomic affiliations of community composition between HiFi and NGS reads at the phylum level.

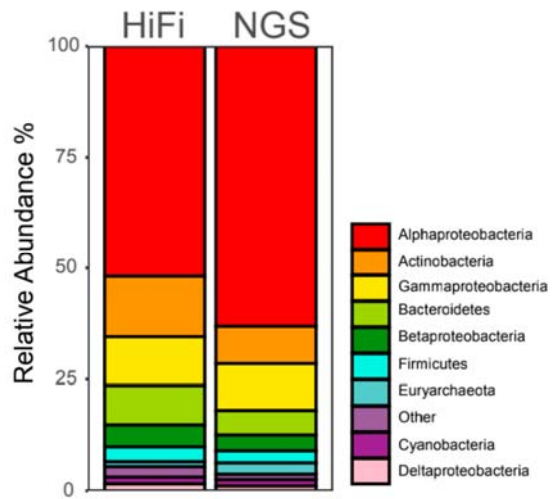

**Figure S4** Phylogenomic tree and heatmap based on ANI values of cMAG ccl-hifiasmmeta.15 and its close genomes.

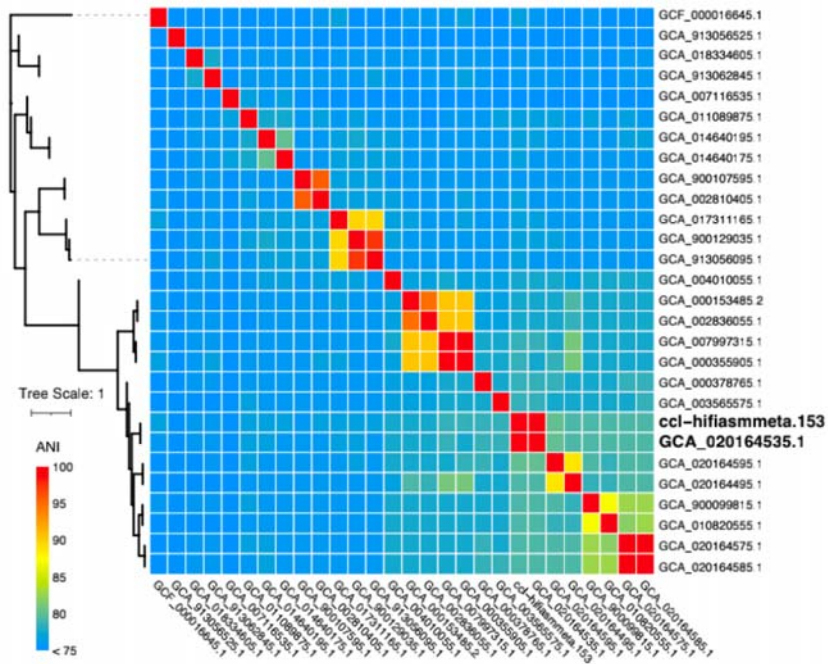

**Figure S5** Two cMAGs circle maps. (A) *ccl-hifiasmmeta.153* had two circular chromosomes. (B) *ccl-flye.84*. The outermost circle of the circle diagram is the identification of the genome size, the second circle, and the third circle are the CDSs on the forward and reverse strands, and different colors indicate the functional classification of the coding genes. The fourth circle is the GC content, and the fifth circle is the G+C skew.

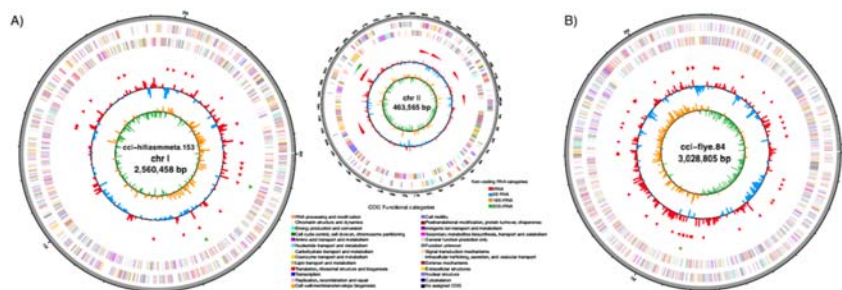

**Figure S6** Proteomic trees based on 1-S<sub>G</sub> distance matrix of 29 cvOTUs and closest known viruses via ViPTree (<https://www.genome.jp/viptree>). Genera and subfamilies are delineated with colored squares and colored circles, respectively. The red star indicates the cvOTUs.

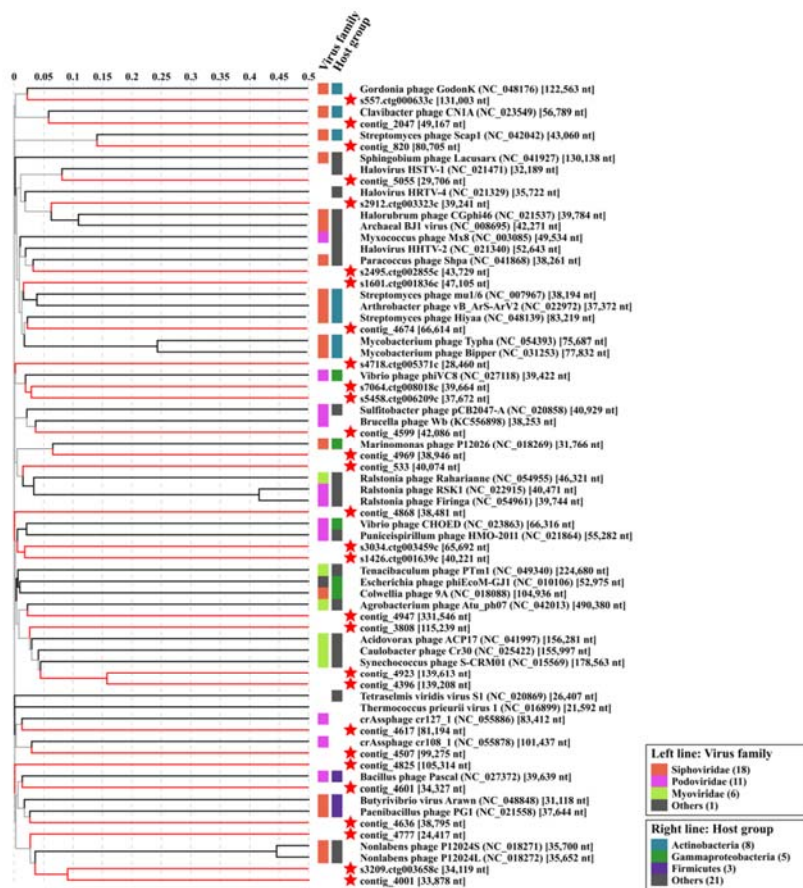

**Figure S7** Heatmap of auxiliary metabolic genes detected in cvOTUs and genome circle maps for two cvOTUs containing *phnP* gene.

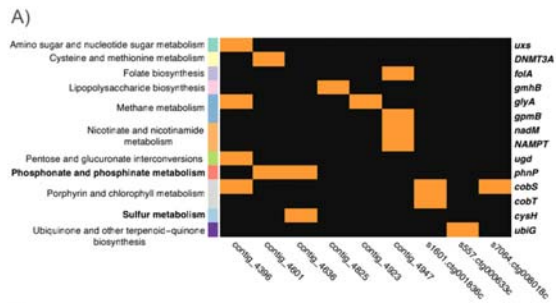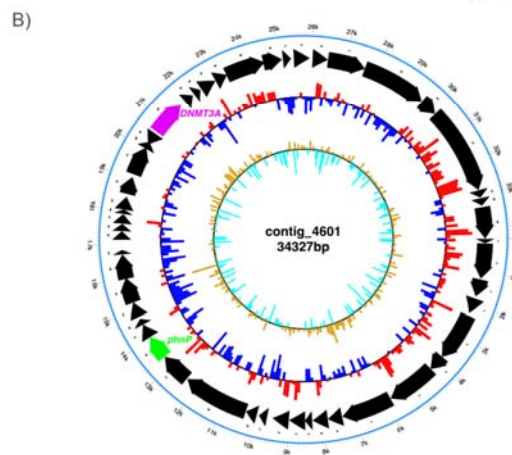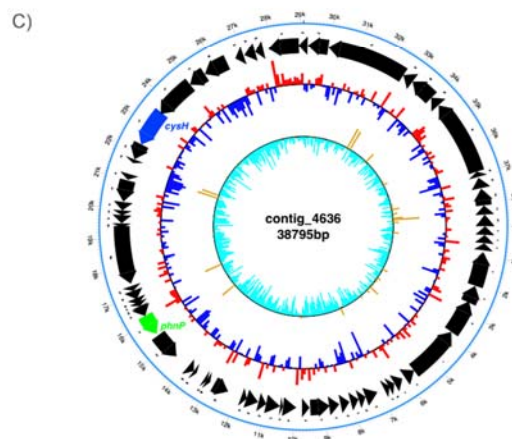

**Figure S8** BGCs analysis. (A) The number of novel and known BGCs from eight assemblies. The distribution of different classes of complete (B) and partial (C) BGCs from eight assemblies.

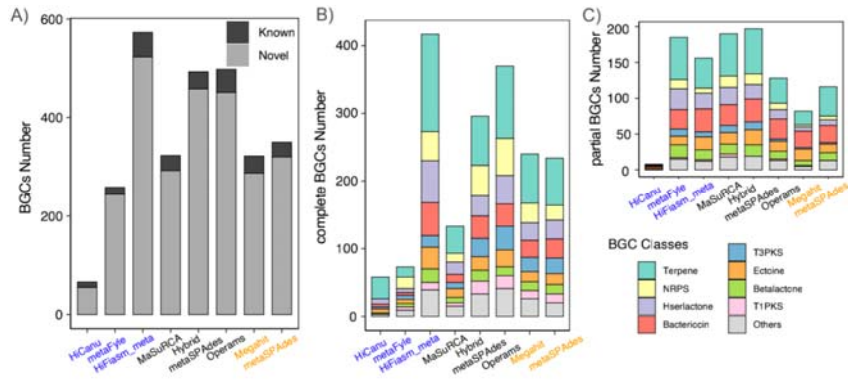

**Figure S9** Estimated coverage of the metagenomic data sets obtained in this study. (A)

Fitted Nonpareil curve and estimated coverage. The maximum coverage was 0.94. (B)

删除了: and the

The genome size of Megahit assemblies under increasing NGS data.

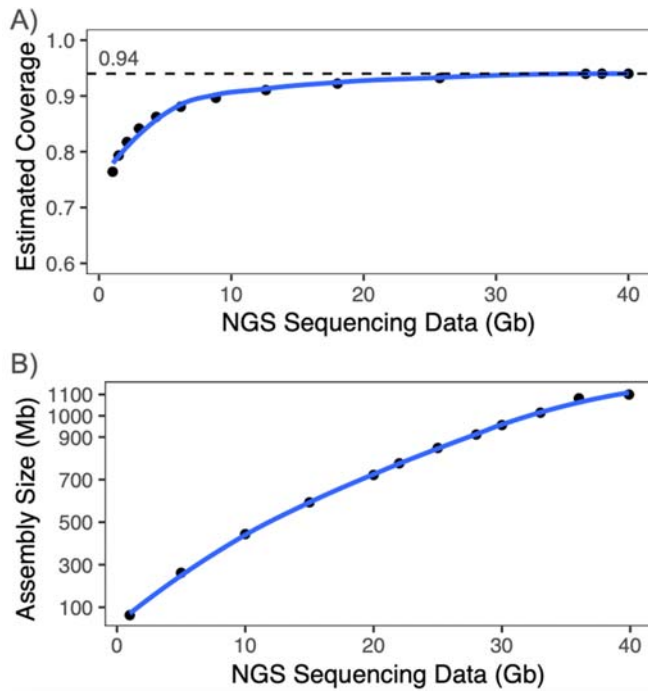

Supplement: spectrum.03328-22-s0001.pdf [file spectrum.03328-22-s0001.pdf]
